# Supplementary material
Source: PubMed Central journal article supplement (PMC8178189)
Supplement: NIHMS1668020-supplement-2.pdf [file NIHMS1668020-supplement-2.pdf]

**Supplementary Table S1.** Analysis of putative TNIK inhibitor-resistant mutants

| Site | Region                                             | Mutation            | Active            | Inhibitor-resistant |
|------|----------------------------------------------------|---------------------|-------------------|---------------------|
| V31  | Pocket Protector<br>(G-loop -1)                    | V31R<br><b>V31W</b> | Yes<br><b>Yes</b> | No<br><b>Yes</b>    |
| Y36  | G-loop +5                                          | Y36F                | Reduced           | No                  |
| F107 | Gatekeeper + 2                                     | F107G               | Yes               | No                  |
| C108 | Gatekeeper + 3<br>(Hydrogen bond with<br>NCB-0846) | C108M               | Yes               | No                  |
| G111 | Gatekeeper + 6                                     | G111Q<br>G111R      | Yes<br>Yes        | No<br>No            |
| S112 | Gatekeeper + 7                                     | S112Q               | No                | n.a.                |
| V170 | DGF -1                                             | V170T<br>V170W      | No<br>No          | n.a.<br>n.a.        |

n.a., not applicable.

**Supplementary Table S2.** Alignment of Merlin Human and Fly sequences around the Merlin residues that conform to the TNIK consensus phosphorylation motif (1).

| Site | Species | Sequence |   |   |   |          |   |   |   |   |
|------|---------|----------|---|---|---|----------|---|---|---|---|
| S13  | Human   | M        | S | F | S | <b>S</b> | L | K | R | K |
|      | Fly     | S        | P | F | G | <b>S</b> | K | K | N | R |
| T23  | Human   | P        | K | T | F | <b>T</b> | V | R | I | V |
|      | Fly     | N        | R | S | L | <b>S</b> | V | R | V | S |
| T272 | Human   | D        | K | E | F | <b>T</b> | I | K | P | L |
|      | Fly     | D        | K | K | F | <b>T</b> | I | R | L | V |
| S315 | Human   | R        | K | A | D | <b>S</b> | L | E | V | Q |
|      | Fly     | R        | K | P | D | <b>T</b> | M | E | I | Q |
| T576 | Human   | S        | K | H | N | <b>T</b> | I | K | K | L |
|      | Fly     | N        | K | Y | S | <b>T</b> | L | K | K | L |

**Supplementary Table S3.** Mass spectrometry phospho-peptide analysis (HEK 293T cells; Merlin and TNIK co-expression).

| Merlin p-site (PSM) | Condition                | Relative Abundance ( $\times 10^2$ ) | Fold   |
|---------------------|--------------------------|--------------------------------------|--------|
| pS13<br>(33)        | Empty vector             | n.d.                                 | -      |
|                     | Merlin                   | 0.044                                | 1.00   |
|                     | Merlin + TNIK            | 0.501                                | 11.35  |
|                     | Merlin + TNIK + NCB-0846 | 0.170                                | 3.86   |
|                     | Merlin + TNIK K54R       | 0.015                                | 0.33   |
| pT272<br>(83)       | Empty vector             | n.d.                                 | -      |
|                     | Merlin                   | 0.010                                | 1.00   |
|                     | Merlin + TNIK            | 1.170                                | 116.56 |
|                     | Merlin + TNIK + NCB-0846 | 0.841                                | 84.11  |
|                     | Merlin + TNIK K54R       | 0.002                                | 0.19   |
| pS315<br>(175)      | Empty vector             | 0.89                                 | -      |
|                     | Merlin                   | 0.179                                | 1.00   |
|                     | Merlin + TNIK            | 25.663                               | 143.74 |
|                     | Merlin + TNIK + NCB-0846 | 23.872                               | 133.71 |
|                     | Merlin + TNIK K54R       | 0.114                                | 0.64   |
| pS518<br>(139)      | Empty vector             | 0.804                                | -      |
|                     | Merlin                   | 0.236                                | 1.00   |
|                     | Merlin + TNIK            | 3.876                                | 0.81   |
|                     | Merlin + TNIK + NCB-0846 | 2.462                                | 0.52   |
|                     | Merlin + TNIK K54R       | 4.794                                | 1.00   |
| pS566<br>(35)       | Empty vector             | n.d.                                 | -      |
|                     | Merlin                   | 0.236                                | 1.00   |
|                     | Merlin + TNIK            | 0.536                                | 2.27   |
|                     | Merlin + TNIK + NCB-0846 | 0.366                                | 0.67   |
|                     | Merlin + TNIK K54R       | 0.157                                | 0.16   |
| pT576<br>(n.d.)     | Empty vector             | n.a.                                 | -      |
|                     | Merlin                   | n.a.                                 | -      |
|                     | Merlin + TNIK            | n.a.                                 | -      |
|                     | Merlin + TNIK + NCB-0846 | n.a.                                 | -      |
|                     | Merlin + TNIK K54R       | n.a.                                 | -      |
| pT581<br>(5)        | Empty vector             | n.d.                                 | -      |
|                     | Merlin                   | 0.009                                | 1.00   |
|                     | Merlin + TNIK            | 0.012                                | 1.32   |
|                     | Merlin + TNIK + NCB-0846 | 0.004                                | 0.49   |
|                     | Merlin + TNIK K54R       | 0.003                                | 0.31   |

n.d., not detected; n.a., not applicable.

**Supplementary Table S4.** Molecular dynamics simulations of Merlin WT and following phosphorylation of different Merlin residues.

| Site(s)                          | RMSF (Å) | $\Delta$ RMSF (Å) | RG (Å) | $\Delta$ RG(50%) (Å) |
|----------------------------------|----------|-------------------|--------|----------------------|
| <b>S13</b>                       | 2.4      | 0.5               | 35.6   | 0.81                 |
| <b>T272</b>                      | 1.9      | 0.2               | 35.4   | 0.80                 |
| <b>S315</b>                      | 2.3      | 0.4               | 35.0   | 0.79                 |
| <b>S518</b>                      | 2.8      | 0.7               | 37.5   | 1.20                 |
| <b>T576</b>                      | 2.2      | 0.4               | 37.4   | 1.02                 |
| <b>S13, T272,<br/>S315, T576</b> | 2.0      | 0.3               | 35.1   | 1.11                 |
| <b>WT</b>                        | 1.9      | -                 | 36.0   | 0.80                 |

RMSF: root-mean square fluctuation; RG: radius of gyration.

**Supplementary Table S5.** List of oligonucleotides used in this study.

|                                                                                                                                                                                                                                                                                                                                                                                                                             |
|-----------------------------------------------------------------------------------------------------------------------------------------------------------------------------------------------------------------------------------------------------------------------------------------------------------------------------------------------------------------------------------------------------------------------------|
| <p><b>shRNA control</b></p> <p>Forward:<br/>5' CCGGCAACAAGATGAAGAGCACCAACTCGAGTTGGTGCTCTTCATCTTGTTGTTTT 3'</p> <p>Reverse:<br/>5' AATTA AAAACAACAAGATGAAGAGCACCAACTCGAGTTGGTGCTCTTCATCTTGTTG 3'</p>                                                                                                                                                                                                                         |
| <p><b>shRNA TNIK#1</b></p> <p>Forward:<br/>5' CCGGGCTCCTAAACCGTATCATAAACTCGAGTTTATGATACGGTTTAGGAGCTTTTT 3'</p> <p>Reverse:<br/>5' AATTA AAAAGCTCCTAAACCGTATCATAAACTCGAGTTTATGATACGGTTTAGGAGC 3'</p>                                                                                                                                                                                                                         |
| <p><b>shRNA TNIK#2</b></p> <p>Forward:<br/>5' CCGGGTGGCCTACATTCATTCCAATCTCGAGATTGGAATGAATGTAGGCCACTTTTT 3'</p> <p>Reverse:<br/>5' AATTA AAAAGTGGCCTACATTCATTCCAATCTCGAGATTGGAATGAATGTAGGCCAC 3'</p>                                                                                                                                                                                                                         |
| <p><b>Cloning primers <i>attB</i>-TNIK</b></p> <p>Forward: 5'<br/>GGGACAAGTTTGTACAAAAAAGCAGGCTTTATGGCGAGCGACTCCCCGGCTCGAA 3'</p> <p>Reverse: 5'<br/>GGGACCACTTTGTACAAGAAAGCTGGGTATTACCAGTTCATCATGGAATTTCTG 3'</p>                                                                                                                                                                                                           |
| <p><b>Mutagenesis TNIK K54R (a161g)</b></p> <p>Forward: 5' GCCAGCTTGCAGCCATCAGGGTTATGGATGTC 3'</p> <p>Reverse: 5' GACATCCATAACCCTGATGGCTGCAAGCTGGC 3'</p>                                                                                                                                                                                                                                                                   |
| <p><b>Mutagenesis TNIK V31W (g91t_t92g_t93g_)</b></p> <p>Forward: 5' GGGATCTTTGAATTGGTGGAACCTTTGGGGAAATGGAACATACGGGC 3'</p> <p>Reverse: 5' GCCCGTATGTTCCATTTCCCCAAAGTTCCACCAATTCAAAGATCCC 3'</p>                                                                                                                                                                                                                            |
| <p><b>Mutagenesis TNIK shRNA#1 resistant (t3858c, t3861c, a3864g, g3867t, t3870c, t3873c, a3876g)</b></p> <p>Reaction 1</p> <p>Forward: 5' ATATATGCTTGGGCCCTAAGCCGTACCATAAGTTCATGGCATT 3'</p> <p>Reverse: 5' AAATGCCATGAACTTATGGTACGGCTTAGGGGCCCAAGCATATAT 3'</p> <p>Reaction 2:</p> <p>Forward: 5' ATATATGCTTGGGGCCCCAAGCCTTACCACAAGTTCATGGCATT 3'</p> <p>Reverse: 5' AAATGCCATGAACTTGTGGTAAGGCTTGGGGGCCCAAGCATATAT 3'</p> |
| <p><b>Mutagenesis pDONR221-TNIK ΔSTOP (for generation of pLenti6.3/TO/TNIK-V5)</b></p> <p>Forward: 5' AATTCCATGATGAACTGGGACCCAGCTTTCTTGAC 3'</p> <p>Reverse: 5' GTACAAGAAAGCTGGGTCCCAGTTCATCATGGAATT 3'</p>                                                                                                                                                                                                                 |
| <p><b>Mutagenesis Merlin S13A (t37g)</b></p> <p>Forward: 5' CGCATGAGCTTCAGCGCTCTCAAGAGGAAGC 3'</p> <p>Reverse: 5' GCTTCCTCTTGAGAGCGCTGAAGCTCATGCG 3'</p>                                                                                                                                                                                                                                                                    |
| <p><b>Mutagenesis Merlin S13D (t37g_c38a_)</b></p> <p>Forward: 5' CCCGCATGAGCTTCAGCGATCTCAAGAGGAAGCAAC 3'</p> <p>Reverse: 5' GTTGCTTCCTCTTGAGATCGCTGAAGCTCATGCGGG 3'</p>                                                                                                                                                                                                                                                    |
| <p><b>Mutagenesis Merlin T23A (a67g)</b></p> <p>Forward: 5' CAACCCAAGACGTTCCGCCGTGAGGATCGTCA 3'</p> <p>Reverse: 5' TGACGATCCTCACGGCGAACGCTTGGGTTG 3'</p>                                                                                                                                                                                                                                                                    |
| <p><b>Mutagenesis Merlin T272A (a814g)</b></p> <p>Forward: 5' CGTACAGTGACAAGGAGTTTGCTATTAAACCACTGGATAAG 3'</p> <p>Reverse: 5' CTTATCCAGTGGTTTAATAGCAAACCTCTTGTCCTGTACG 3'</p>                                                                                                                                                                                                                                               |

|                                                                                                                                                                                                      |
|------------------------------------------------------------------------------------------------------------------------------------------------------------------------------------------------------|
| <p><b>Mutagenesis Merlin T272D (a814g_c815a_)</b><br/> Forward: 5' CATCTCGTACAGTGACAAGGAGTTTGATATTAACCCTGGATAAGAAAATT 3'<br/> Reverse: 5' AATTTTCTTATCCAGTGGTTAATATCAAACCTCCTTGTCCTGTACGAGATG 3'</p> |
| <p><b>Mutagenesis Merlin S315A (t943g)</b><br/> Forward: 5' GGAGAAGGAAAGCCGATGCTTTGGAAGTTCAGCAG 3'<br/> Reverse: 5' CTGCTGAACTTCCAAAGCATCGGCTTTCCTTCTCC 3'</p>                                       |
| <p><b>Mutagenesis Merlin S315D (t943g_c944a_)</b><br/> Forward: 5' GAGGAGAAGGAAAGCCGATGATTTGGAAGTTCAGCAGATG 3'<br/> Reverse: 5' CATCTGCTGAACTTCCAAATCATCGGCTTTCCTTCTCCTC 3'</p>                      |
| <p><b>Mutagenesis Merlin T576A (a1726g)</b><br/> Forward: 5' GGTGGCAGCAGCAAGCACAATGCCATTA AAAAGC 3'<br/> Reverse: 5' GCTTTTTAATGGCATTGTGCTTGCTGCTGCCACC 3'</p>                                       |
| <p><b>Mutagenesis Merlin T576D (a1726g_c1727a_)</b><br/> Forward: 5' GTGGCAGCAGCAAGCACAATGACATTA AAAAGCTCACCTTGC 3'<br/> Reverse: 5' GCAAGGTGAGCTTTTTAATGTCATTGTGCTTGCTGCTGCCAC 3'</p>               |
| <p><b>Mutagenesis Merlin T581A (a1741g)</b><br/> Forward: 5' CAATACCATTA AAAAGCTCGCCTTG CAGAGCGCCAA 3'<br/> Reverse: 5' TTGGCGCTCTGCAAGGCGAGCTTTTTAATGGTATTG 3'</p>                                  |
| <p><b>TNIK qPCR</b><br/> Forward: 5' TCCACCAAAGGTGCCTCAAA 3'<br/> Reverse: 5' CCCAGAGCACTACCATTCCC 3'</p>                                                                                            |
| <p><b>GAPDH qPCR</b><br/> Forward: 5' AGCCACATCGCTCAGACAC 3'<br/> Reverse: 5' GCCCAATACGACCAAATCC 3'</p>                                                                                             |

### Supplementary References

1. Miller CJ, Lou HJ, Simpson C, van de Kooij B, Ha BH, Fisher OS, *et al.* Comprehensive profiling of the STE20 kinase family defines features essential for selective substrate targeting and signaling output. *PLoS Biol* **2019**;17(3):e2006540 doi 10.1371/journal.pbio.2006540.
