# Supplementary material
Source: PubMed Central journal article supplement (PMC8178189)
Supplement: NIHMS1668020-supplement-4.pdf [file NIHMS1668020-supplement-4.pdf]

## Supplementary Figures

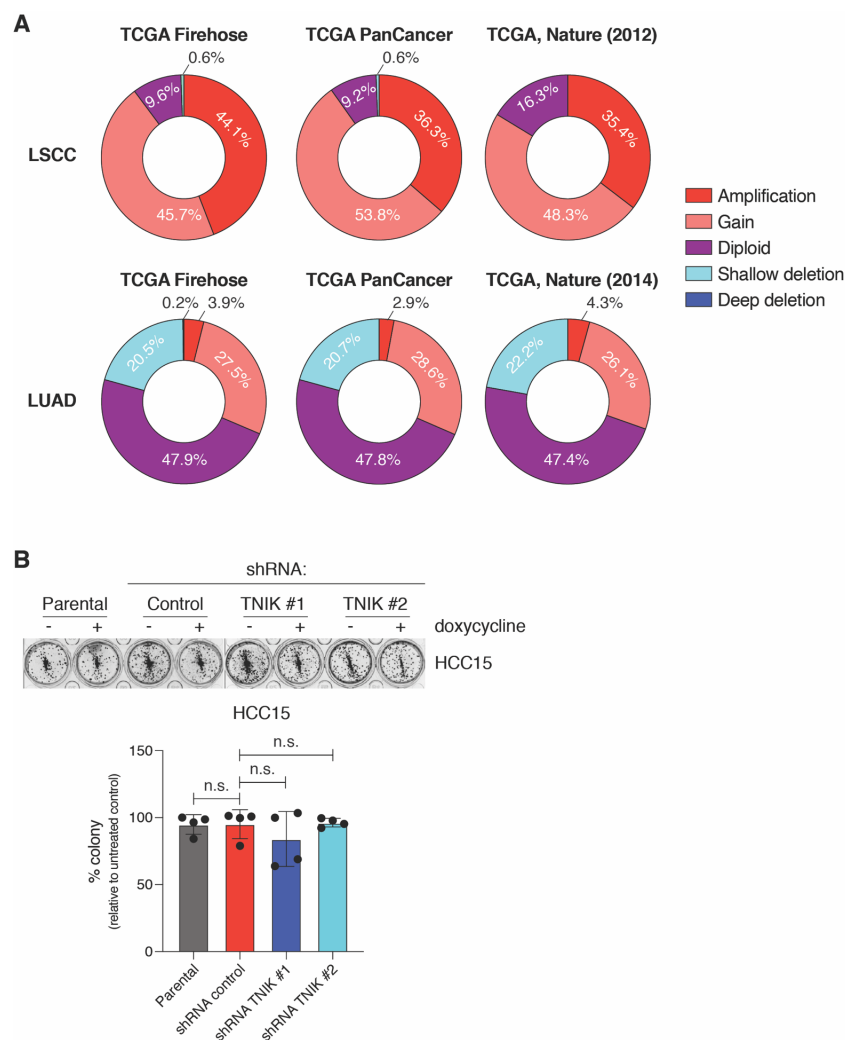

**Supplementary Figure S1. A.** Distribution of *TNIK* genomic alterations in lung squamous cell carcinoma (LSCC) and lung adenocarcinoma (LUAD) from different TCGA datasets. The data were extracted from cBioPortal (1) and the graph generated with Prism 8. **B.** Colony formation assay (14 days) of HCC15 cells following dox-inducible (1  $\mu$ g/ml, replaced every 48 h) *TNIK* knockdown. The image is representative of four independent experiments. Data are represented as mean value  $\pm$  SD, one-way ANOVA, Tukey's multiple comparisons post-test. n.s., not significant.

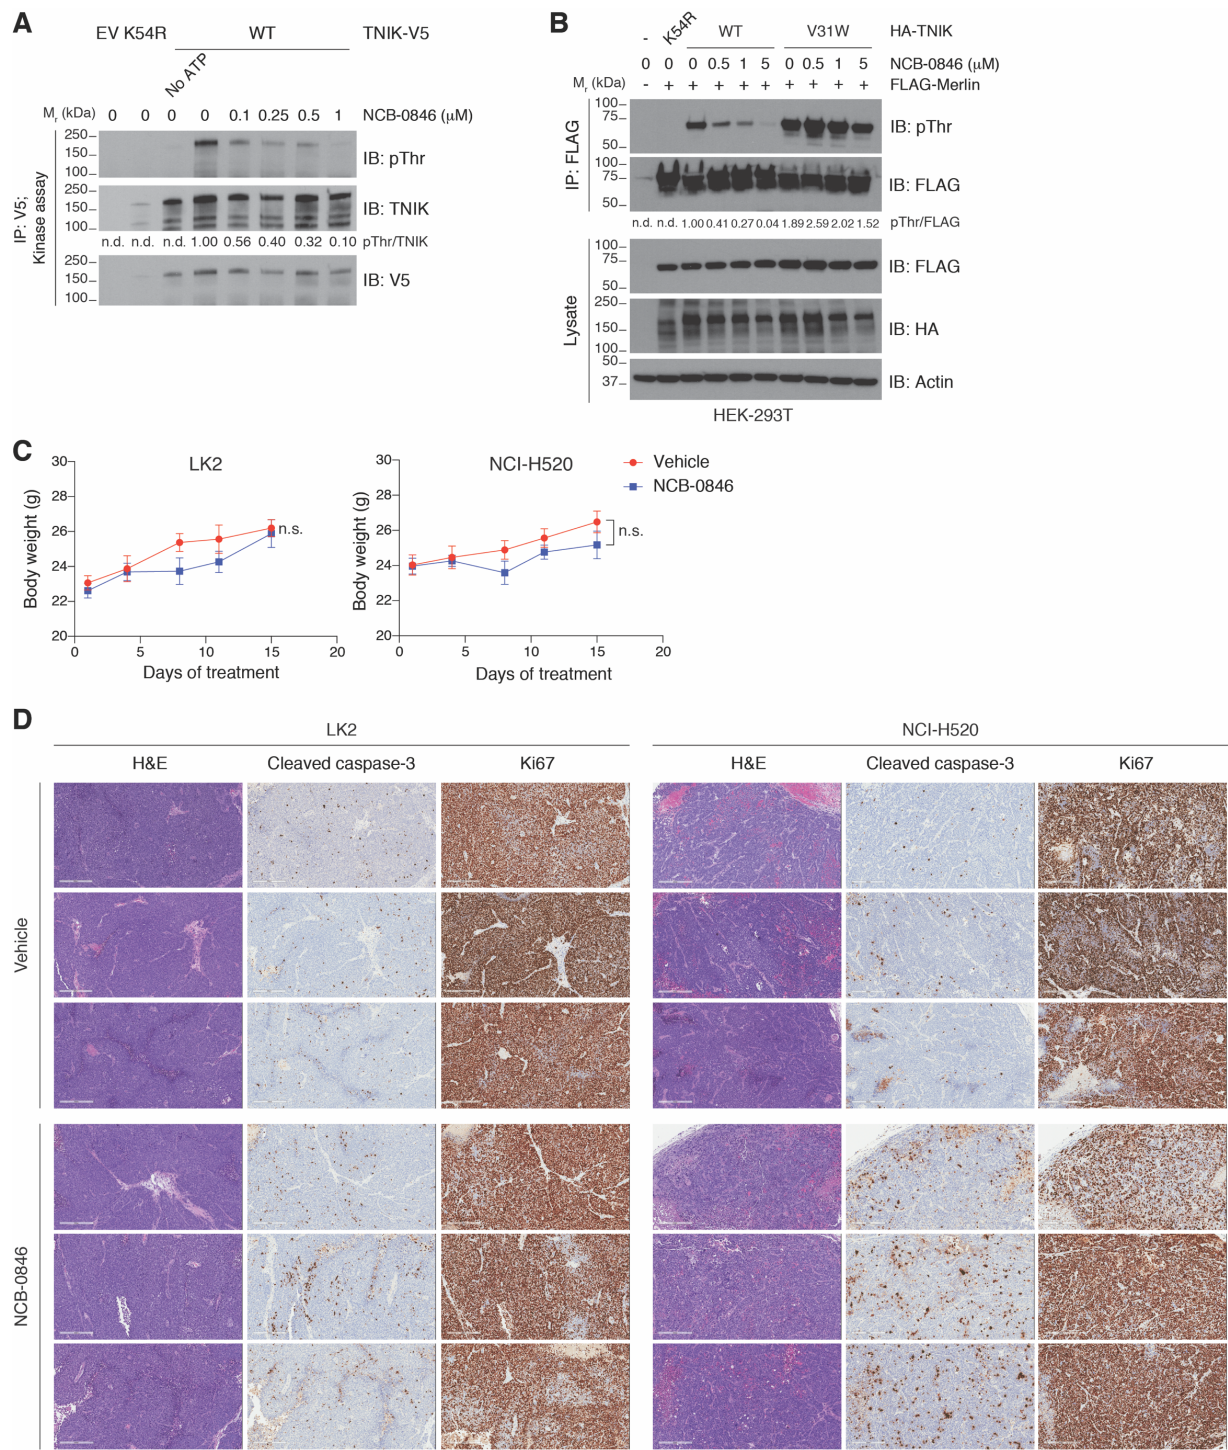

**Supplementary Figure S2. A.** *In vitro* kinase assay of immunoprecipitated TNIK with different doses of NCB-0846. TNIK autophosphorylation was assessed with a pan-phospho-threonine antibody, and normalized to TNIK levels in the immunoprecipitates. Band intensity was quantified with ImageJ (n = 3 independent experiments). **B.** Generation and characterization of a TNIK

inhibitor-resistant mutant (TNIK V31W). TNIK and Merlin were co-expressed in HEK-293T (16 h), after which cells were treated at the indicated NCB-0846 concentrations (1 h). FLAG-Merlin was immunoprecipitated and phosphorylation assessed with a pan-phospho-threonine antibody. Band intensity was quantified with Image J (n = 3 independent experiments). **C.** Mouse body weight curve of LK2-cell-derived xenografts (left, n = 10 mice in the vehicle-treated group; 8 mice in the NCB-0846-treated group.) and NCI-H520-cell-derived xenografts (right, n = 10 mice in the vehicle-treated group; 9 mice in the NCB-0846-treated group) treated with NCB-0846 (100 mg/kg, b.i.d., five days on/two days off). Mean mouse body weight  $\pm$  SEM are shown; two-tailed t-test (LK2); two-tailed Mann–Whitney test (NCI-H520). n.s., not significant. **D.** Representative hematoxylin and eosin (H&E), cleaved caspase-3 and Ki67 immunohistochemistry images from LK2- (left) and NCI-H520 (right) cell derived tumors treated with vehicle or NCB-0846. Scale bar = 300  $\mu$ m.

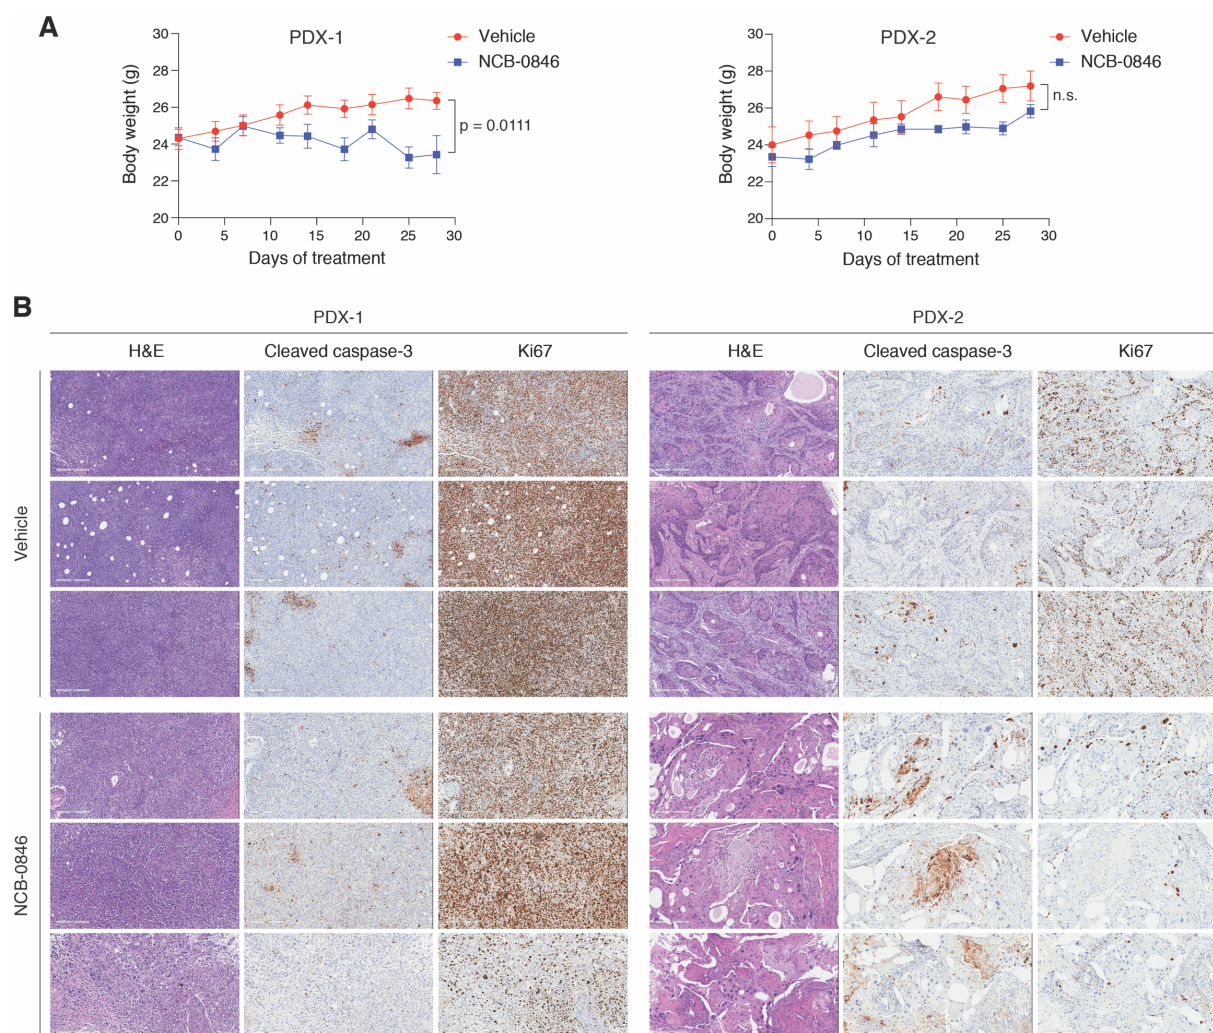

**Supplementary Figure S3. A.** Mouse body weight curve of PDX-1 (left,  $n = 8$  mice/group) and PDX-2 (right,  $n = 9$  mice/group) LSCC-derived patient xenografts treated with NCB-0846 (100 mg/kg, b.i.d., five days on/two days off). Mean mouse weight  $\pm$  SEM are shown; two-tailed t-test with Welch's correction (PDX-1); two-tailed t-test (PDX-2). n.s., not significant. **B.** Representative hematoxylin and eosin (H&E), cleaved caspase-3 and Ki67 immunohistochemistry images from PDX-1 (left) and PDX-2 (right) models treated with vehicle or NCB-0846. Scale bar = 300  $\mu$ m.



mapping. The assay is representative of three independent experiments. **D.** Chromatograms of  $\gamma[^{32}\text{P}]$ -labelled Merlin mutants following in vitro kinase assays to identify TNIK-mediated phosphorylation sites by peptide mapping. Corresponding phosphorylation sites are specified for each peak. **E.** Validation of Merlin pT272 by co-expression of TNIK and Merlin wild-type (WT) or the non-phosphorylatable mutant T272A in HEK 293T cells from two independent experiments. **F.** Analysis of Merlin pT576 and pT581 by co-expression of TNIK and Merlin wild-type (WT) or the non-phosphorylatable mutants T576A, T581A and the double mutant in HEK 293T cells from two independent experiments. n.d.: not detected. Tubulin or GAPDH were used as loading controls. Band intensity was quantified using ImageJ.

**A**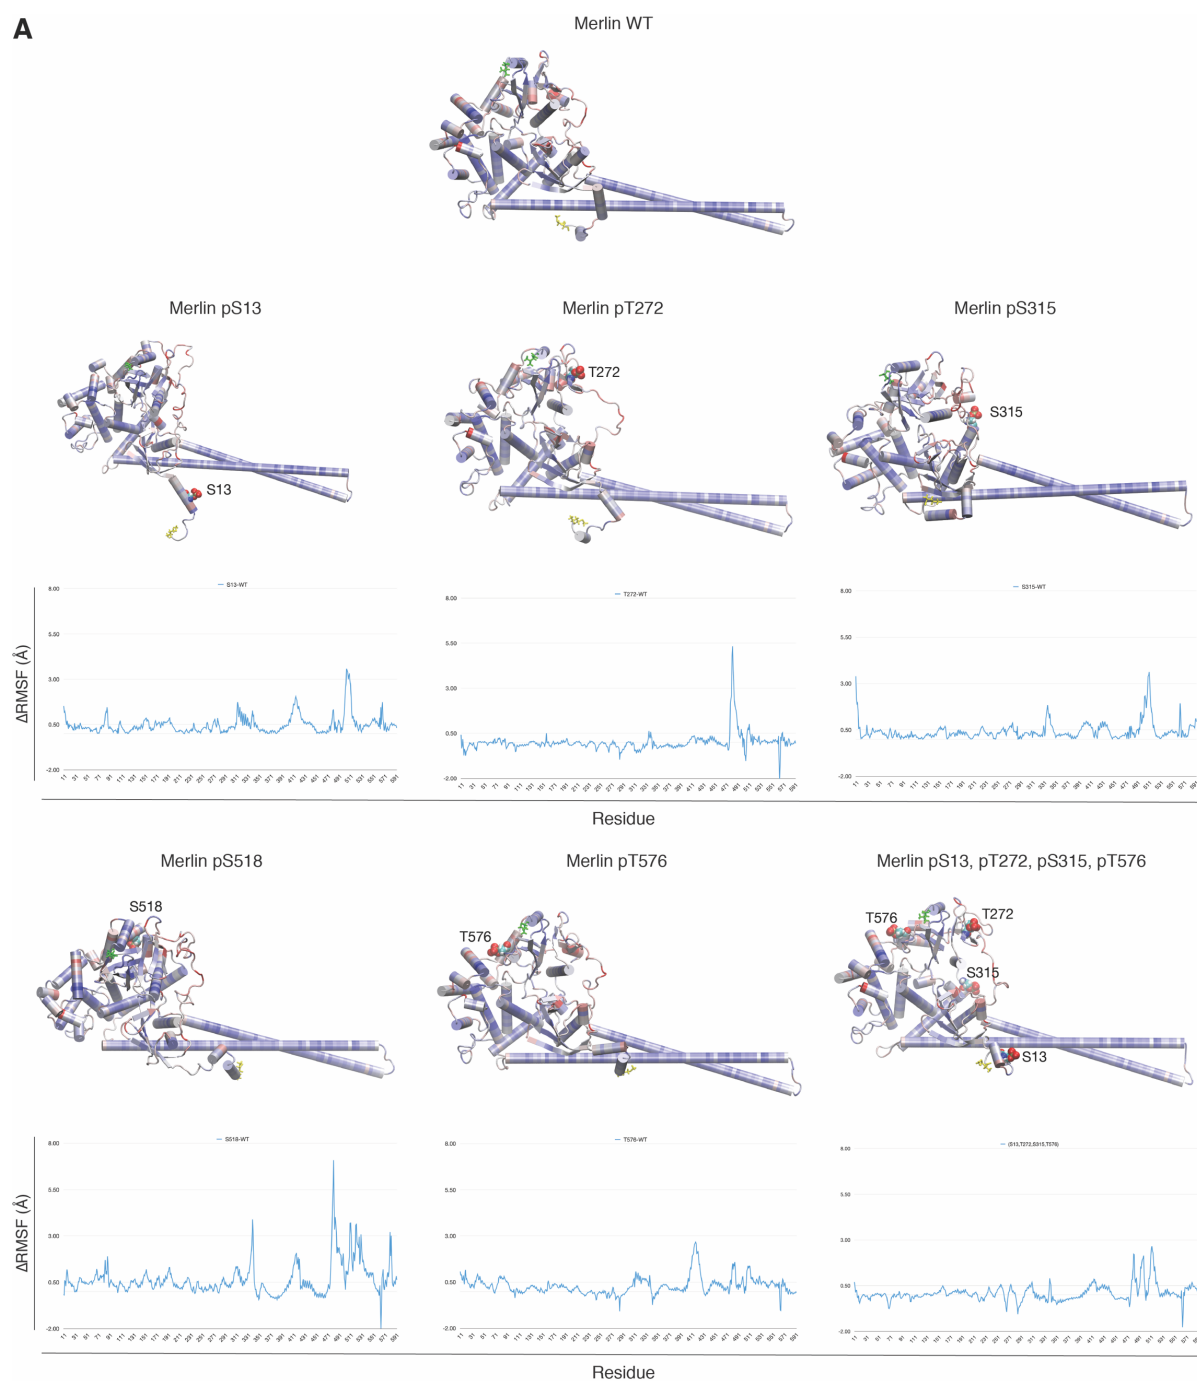

**Supplementary Figure S5.** Structural modeling and molecular dynamics simulations of Merlin phosphorylated at S518 (PKA, PAK2 site) and TNIK-identified phosphosites (S13, T272, S315, and T576).

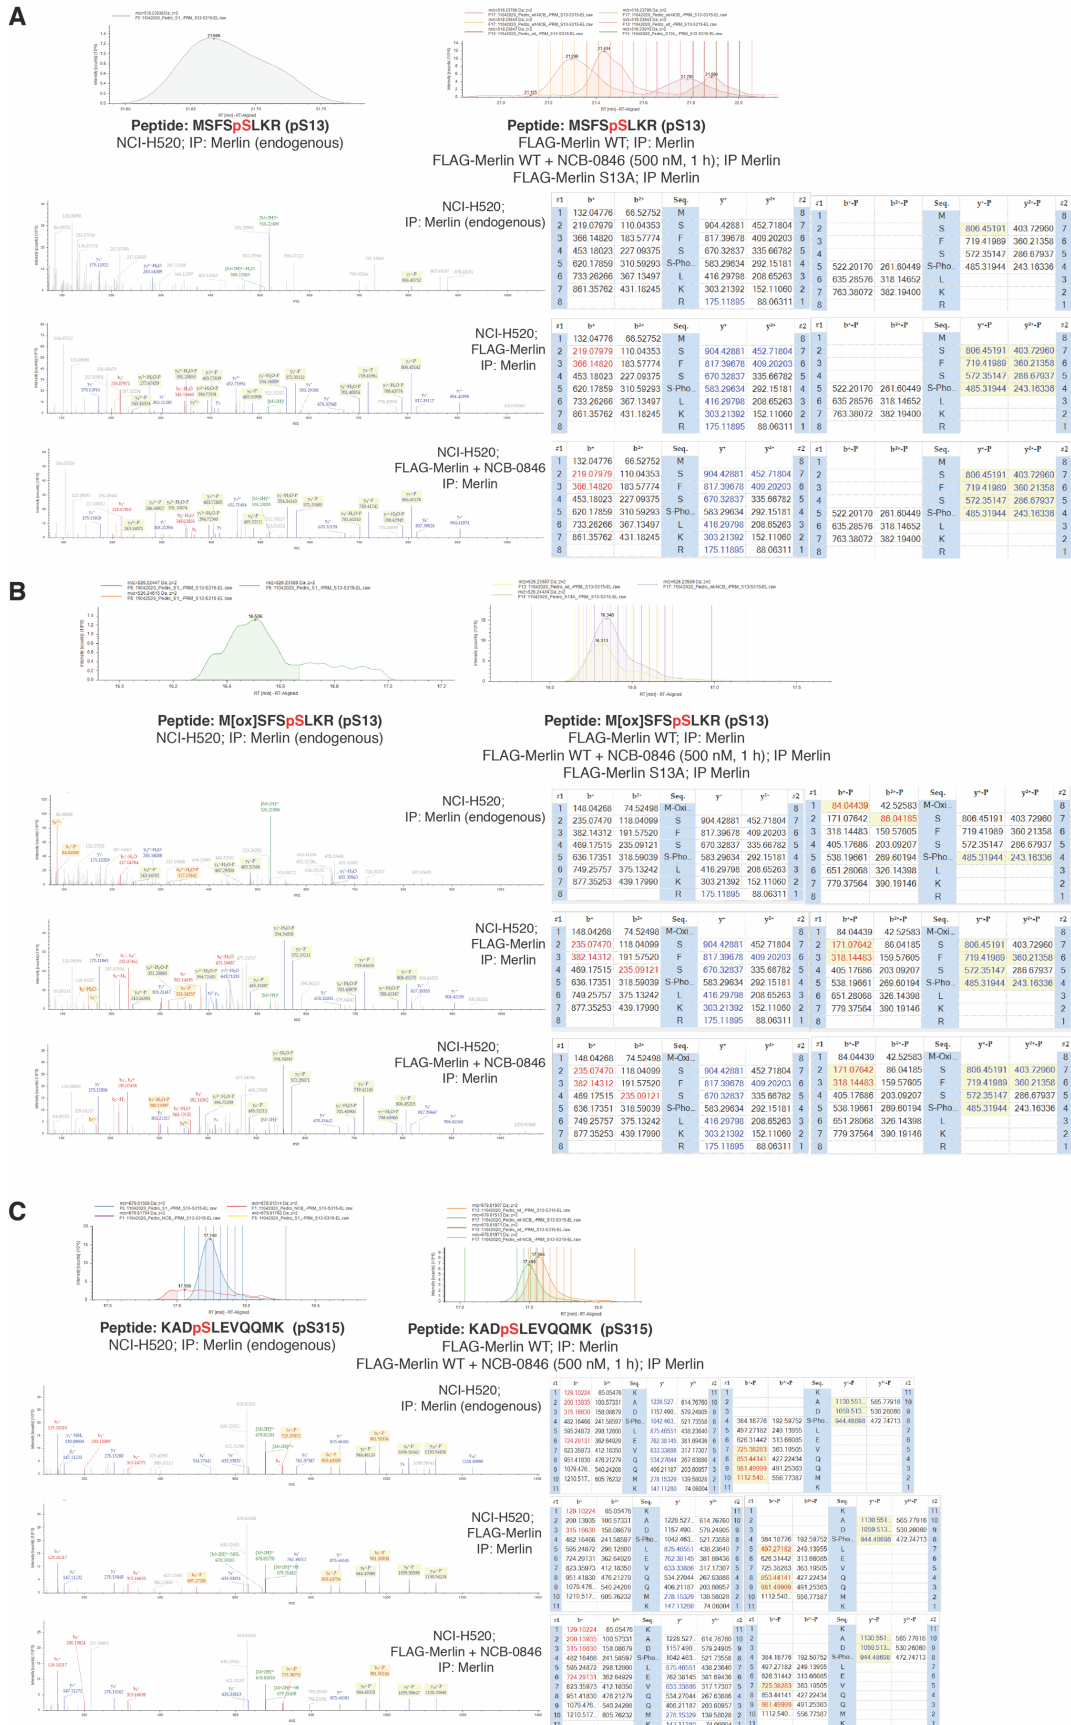

**Supplementary Figure S6. A-C.** Mass spectrometry analysis of phosphopeptides corresponding to Merlin phospho-serine 13 (pS13, A and B) and phospho-serine 315 (pS315, C) from endogenous and overexpressed Merlin pulldowns in NCI-H520 cells. No detectable peaks for pS13 were observed in the endogenous Merlin pulldown from NCB-0846-treated cells (500 nM, 1 h), nor in the FLAG-Merlin S13A condition.

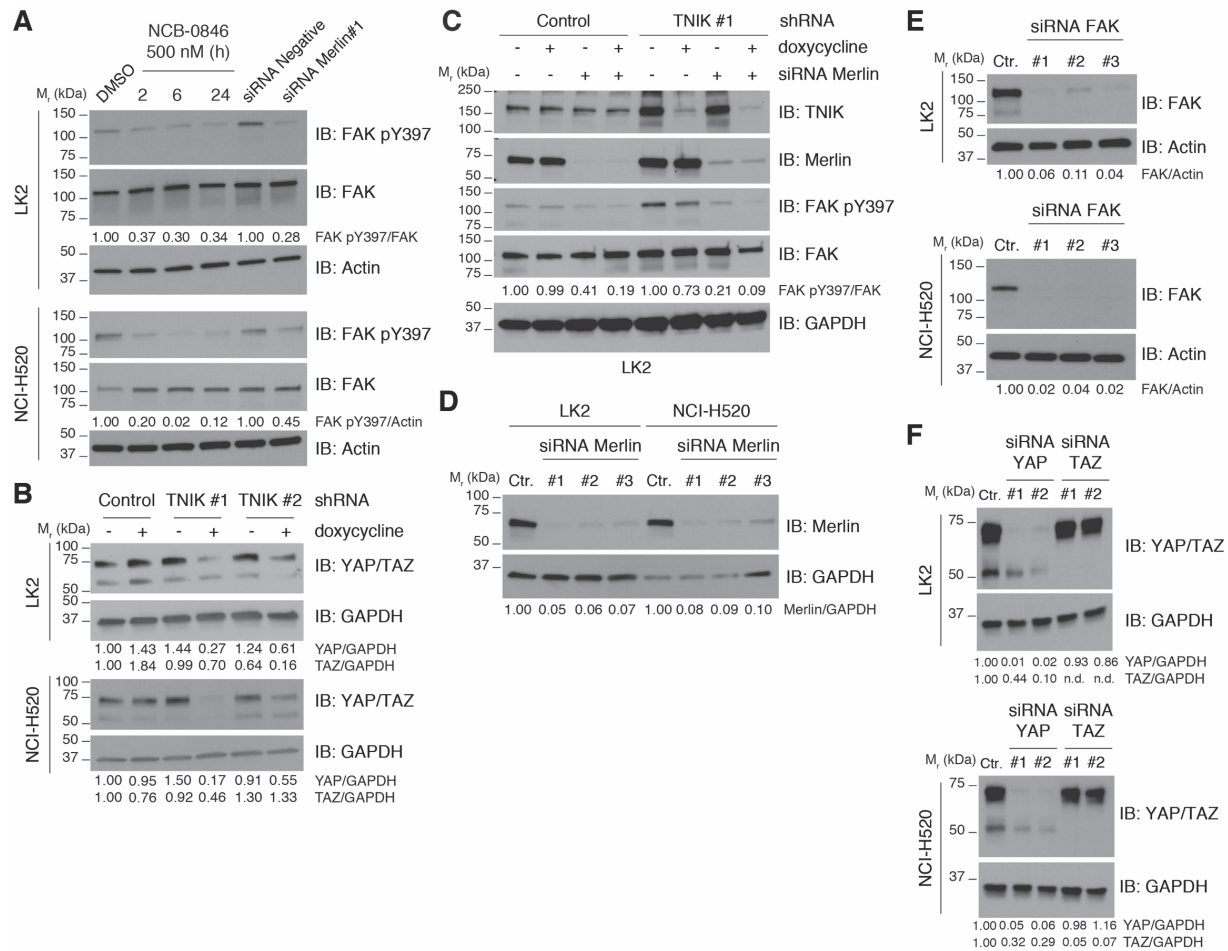

**Supplementary Figure S7.** **A.** Reduced activation of FAK (measured as FAK pY397) after treatment with NCB-0846 (500 nM) for the indicated times or Merlin knockdown (72 h) in LK2 and NCI-H520 cells. **B.** Dox-inducible (1  $\mu$ g/ml, 72 h) knockdown of TNIK reduces YAP levels in LK2 and NCI-H520 cells. The data are representative of three independent experiments. **C.** Combined knockdown of Merlin (96 h) and TNIK (with doxycycline 1  $\mu$ g/ml, 72 h) results in FAK inhibition in LK2 cells ( $n = 3$  independent experiments). **D-F.** Control of efficient Merlin (D), FAK (E) and YAP/TAZ (F) siRNA-mediated knockdown (96 h) in LK2 and NCI-H520 cells (related to Fig. 4I, 4J). The data are representative of  $n \geq 3$  independent experiments. n.d.: not detected. GAPDH or Actin were used as loading controls. Band intensity was quantified using ImageJ.

### Supplementary References

1. Cerami E, Gao J, Dogrusoz U, Gross BE, Sumer SO, Aksoy BA, *et al.* The cBio cancer genomics portal: an open platform for exploring multidimensional cancer genomics data. *Cancer Discov* **2012**;2(5):401-4 doi 10.1158/2159-8290.CD-12-0095.
