# Supplementary material
Source: PubMed Central journal article supplement (PMC8178189)
Supplement: NIHMS1668020-supplement-5.pdf [file NIHMS1668020-supplement-5.pdf]

Fig. 1C

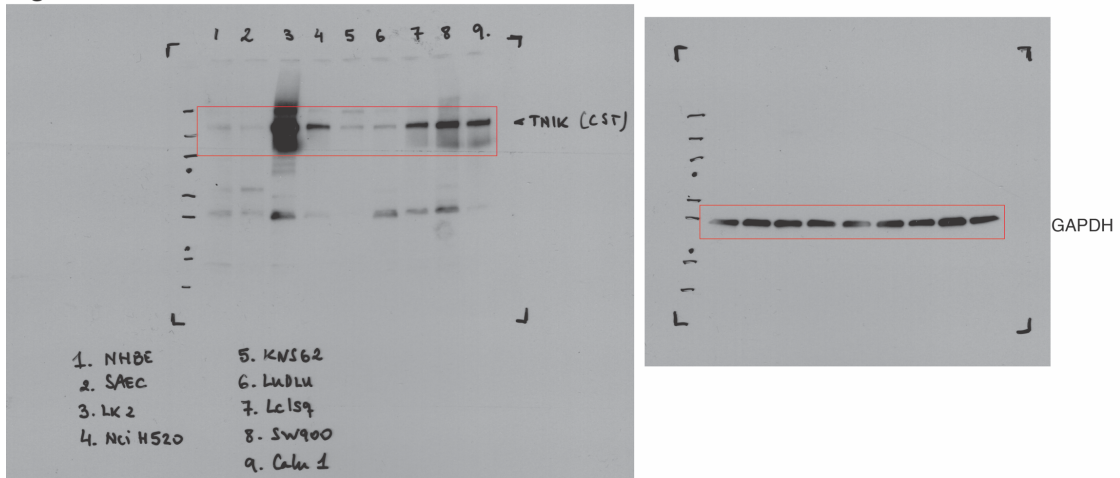

Fig. 1D / LK2 cells

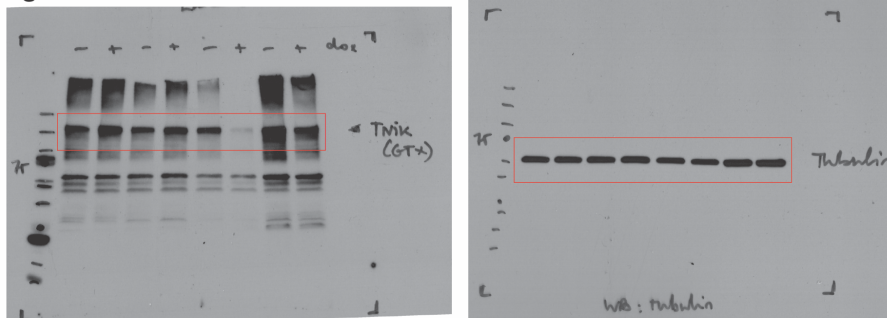

Fig. 1D / NCI-H520 cells

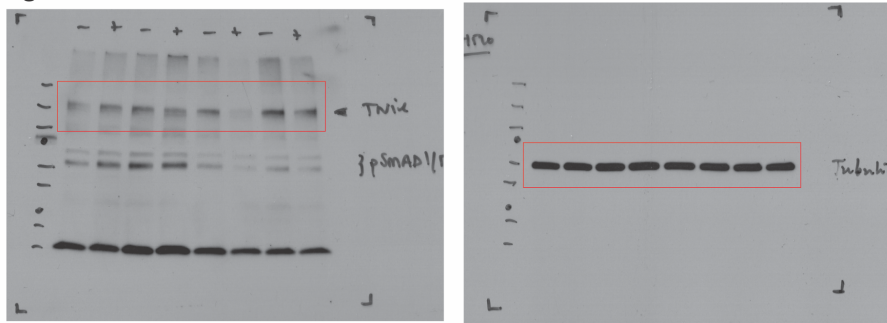

Fig. 1D / SW900 cells

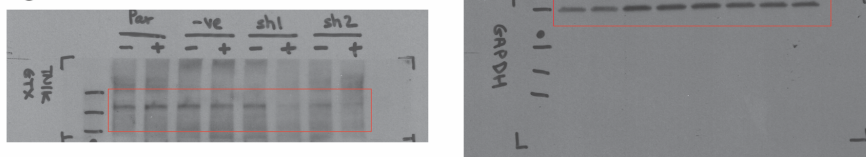

Fig. 1D / NCI-H157

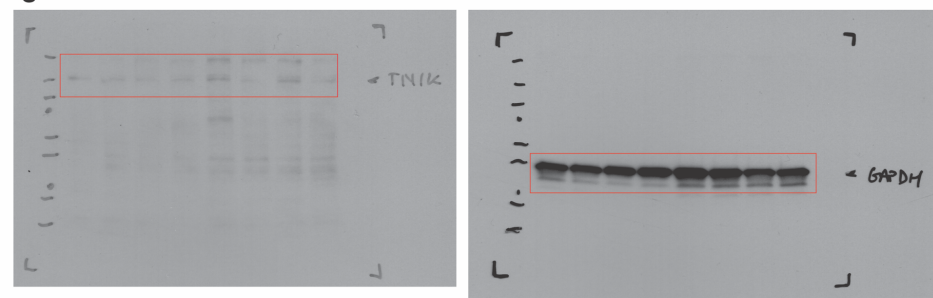

Fig. 1F

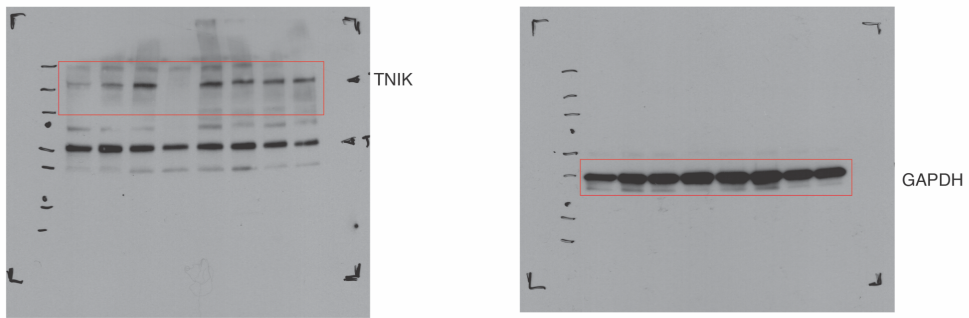

Fig. 2C

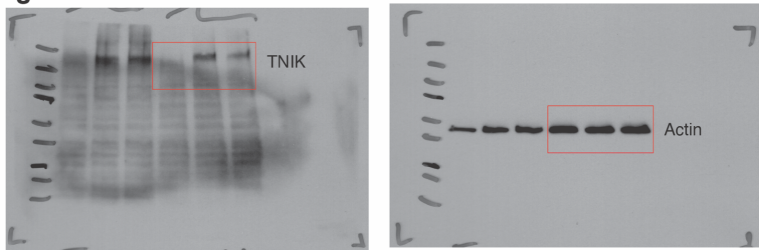

Fig. 2D

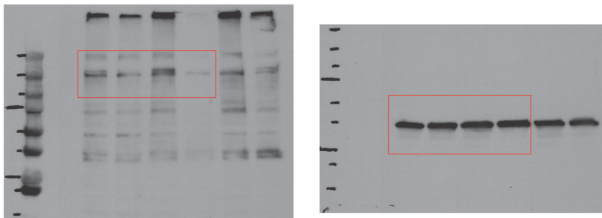

Supplementary Fig. S2A

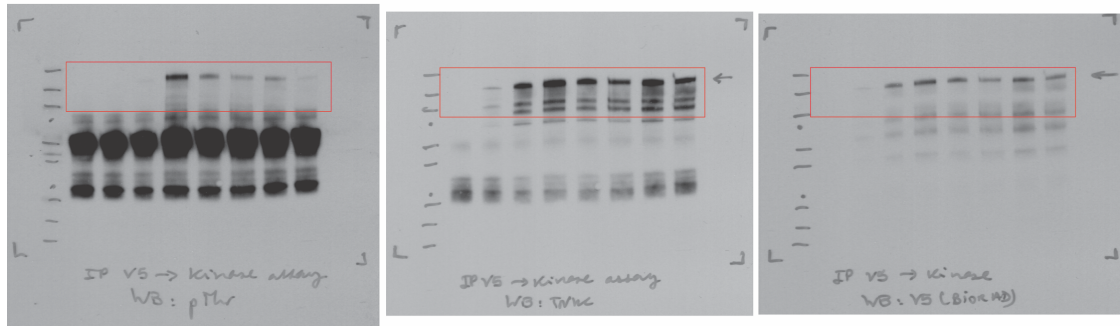

Supplementary Fig. S2B

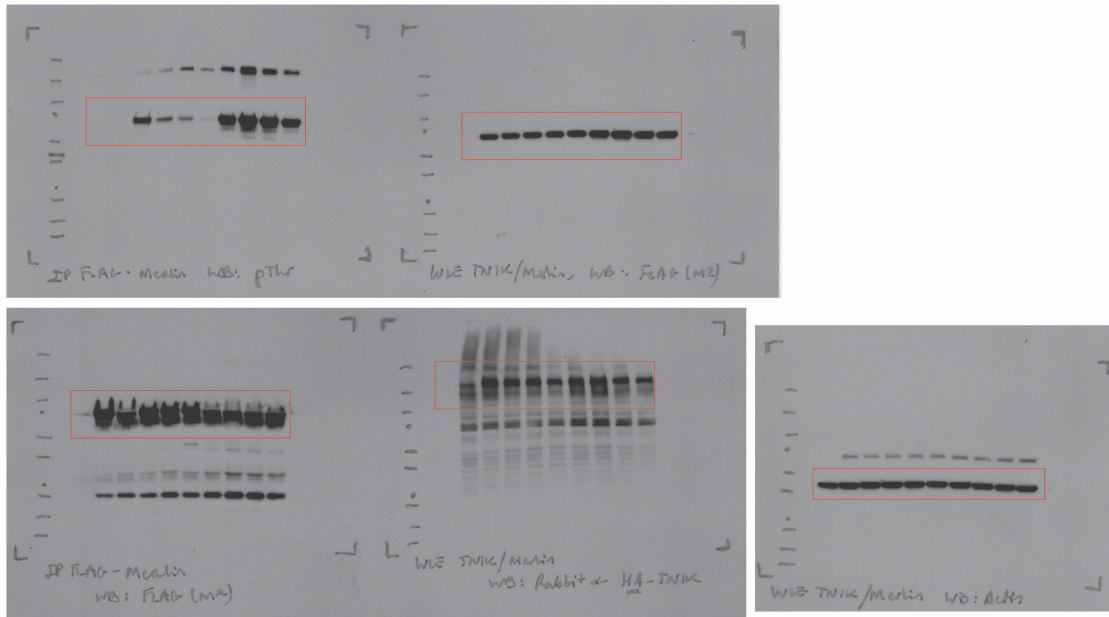

Fig. 4A

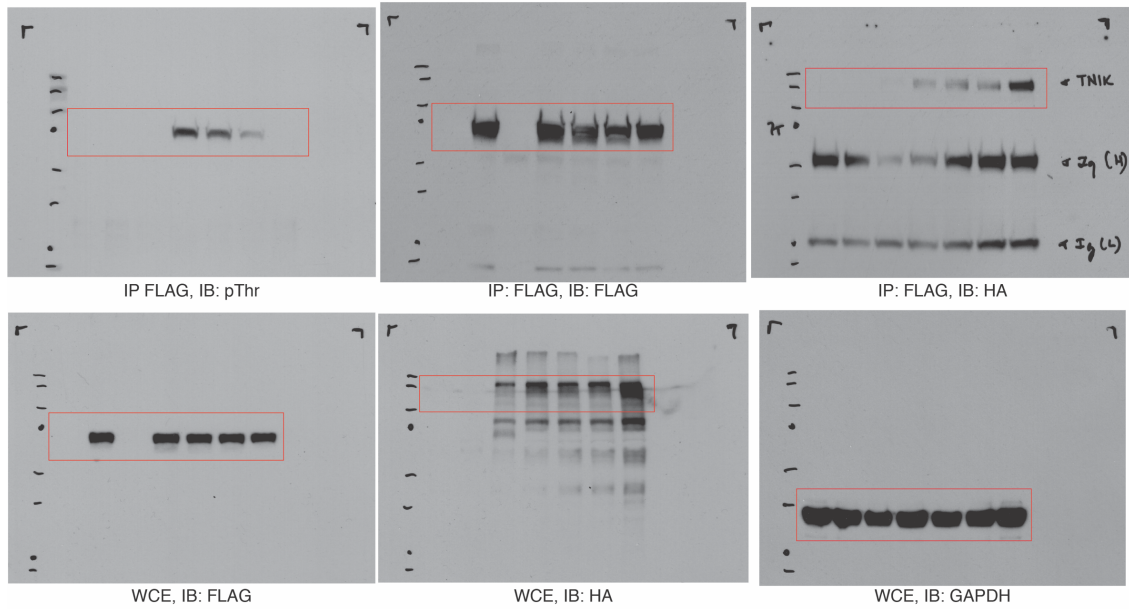

Fig. 4C

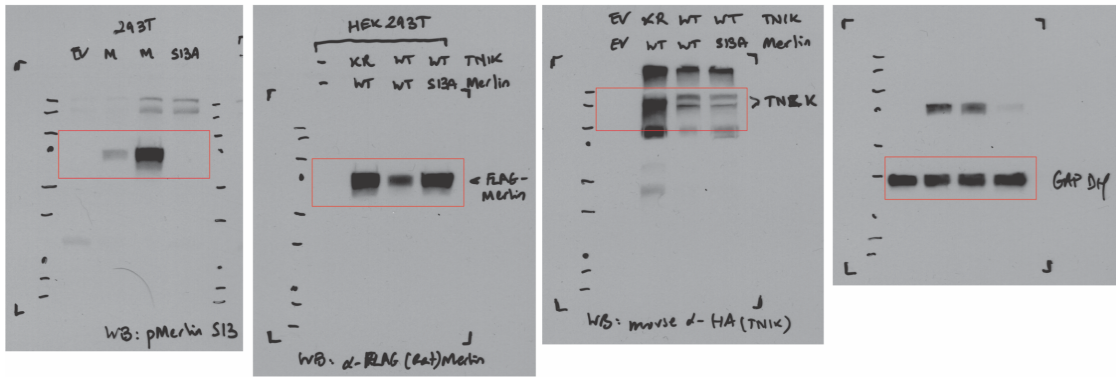

Fig. 4D / LK2 cells

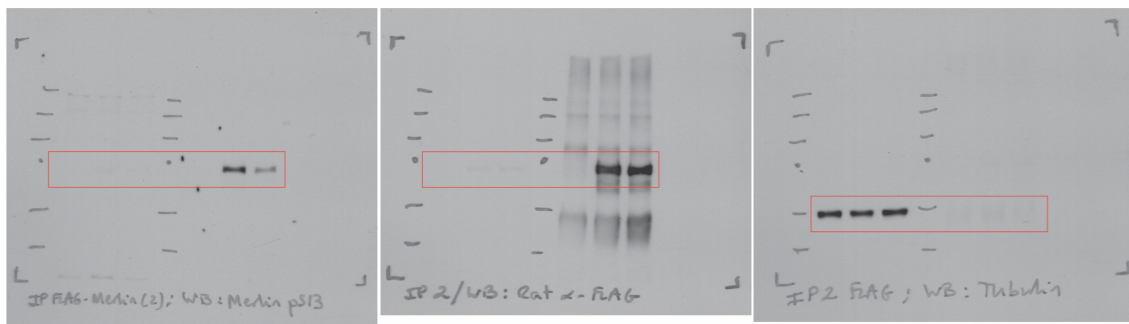

Fig. 4D / NCI-H520 cells

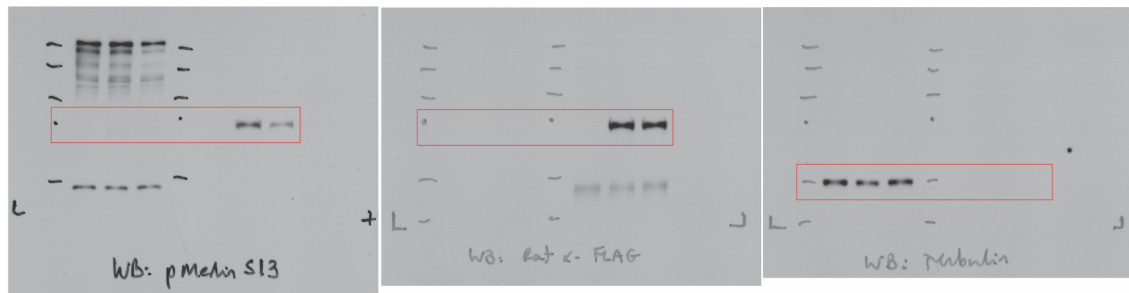

Fig. 4E / LK2 cells

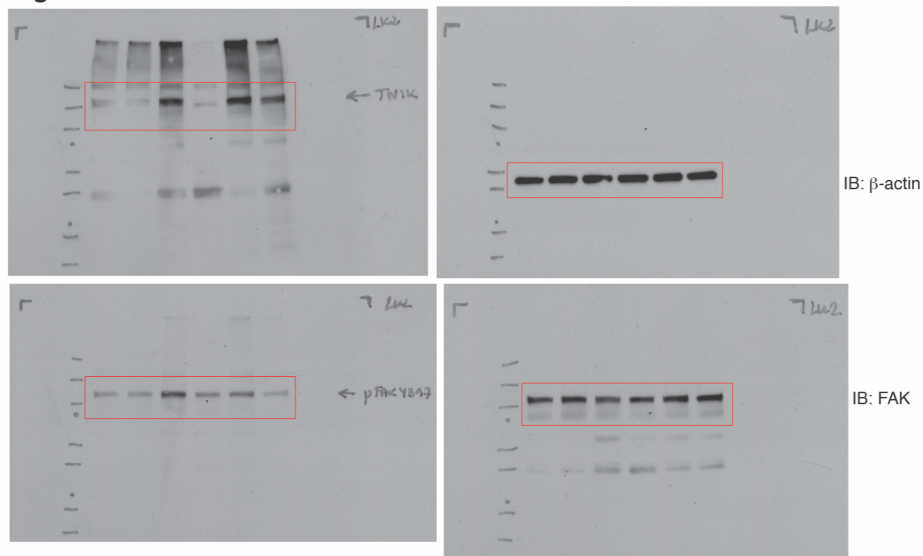

Fig. 4E / NCI-H520 cells

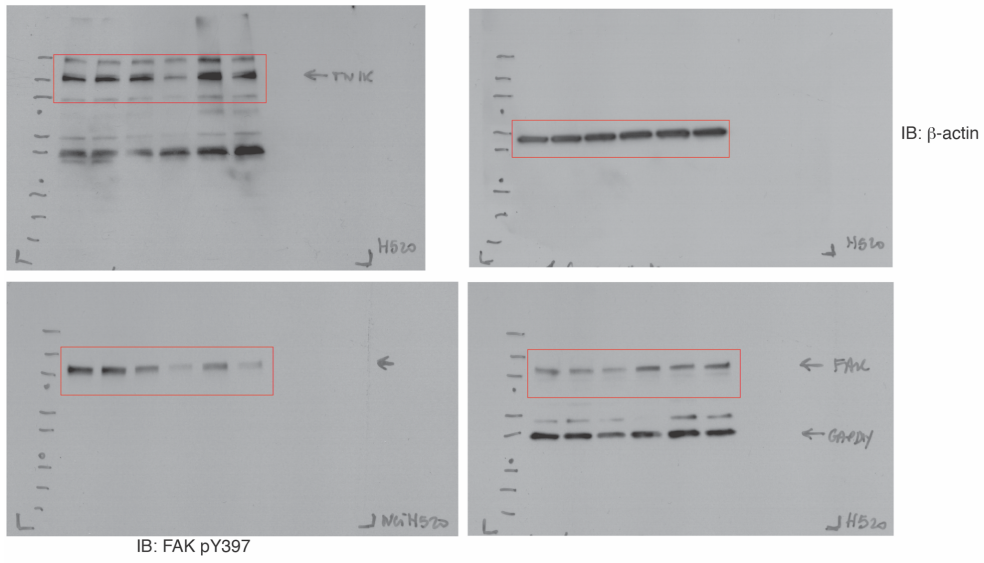

Fig. 4F

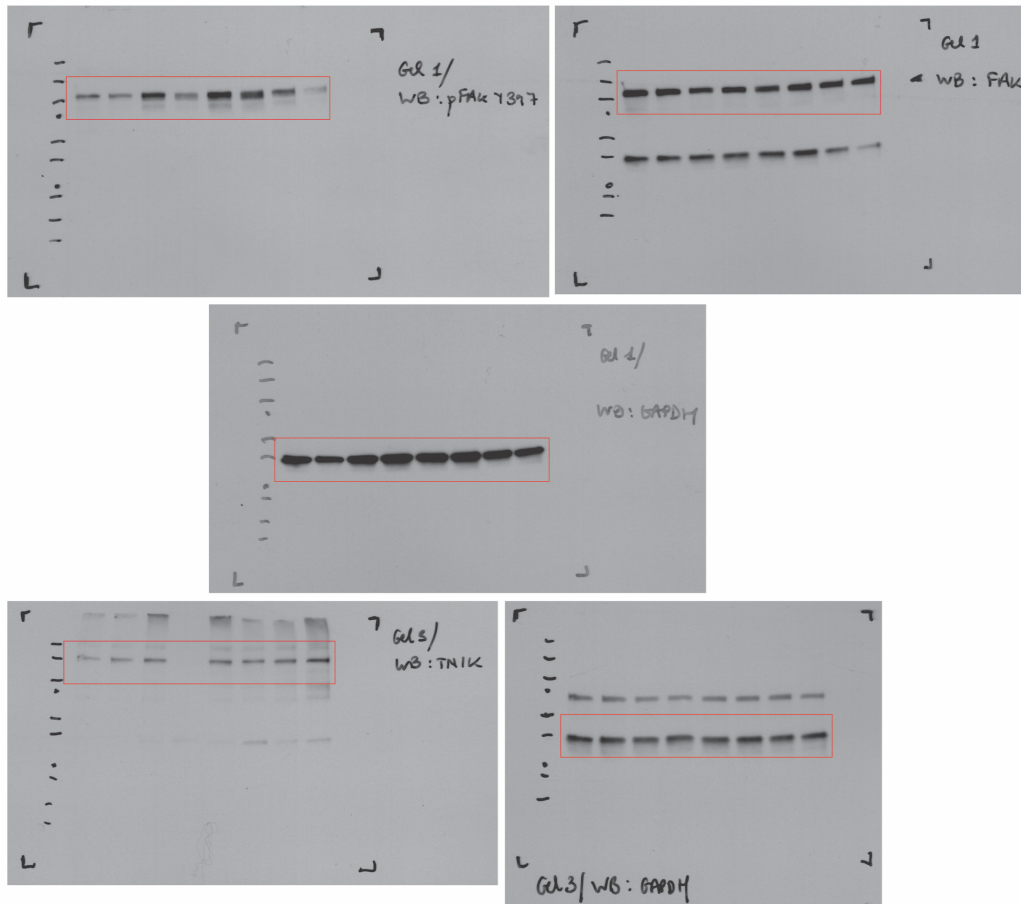

Fig. 4G

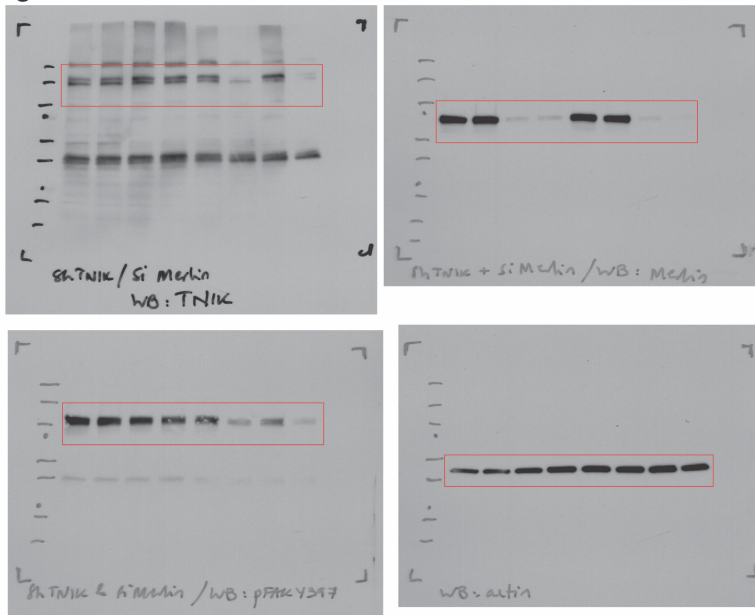

Fig. 4H

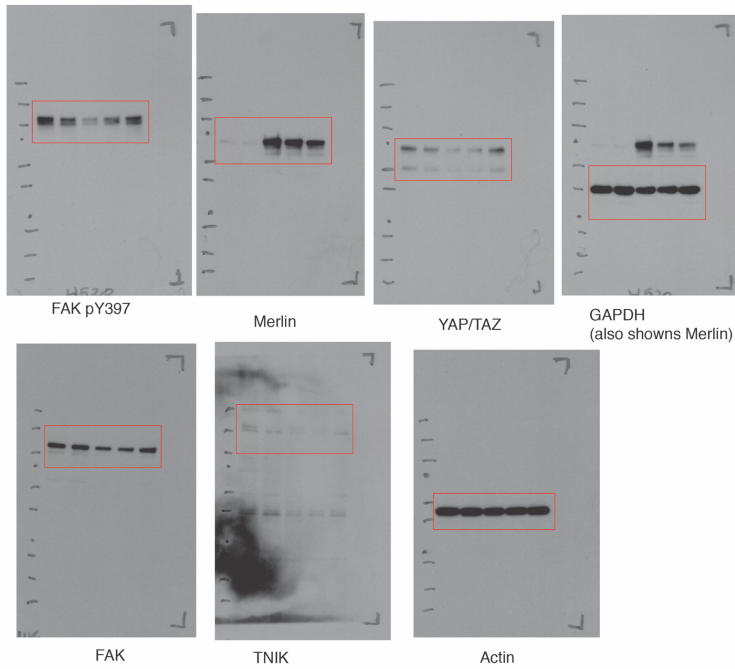

Supplementary Figure S8.1. Uncropped immunoblots reported in this study.
