# Supplementary material
Source: PubMed Central journal article supplement (PMC8178189)
Supplement: NIHMS1668020-supplement-6.pdf [file NIHMS1668020-supplement-6.pdf]

Supplementary Fig. S4A

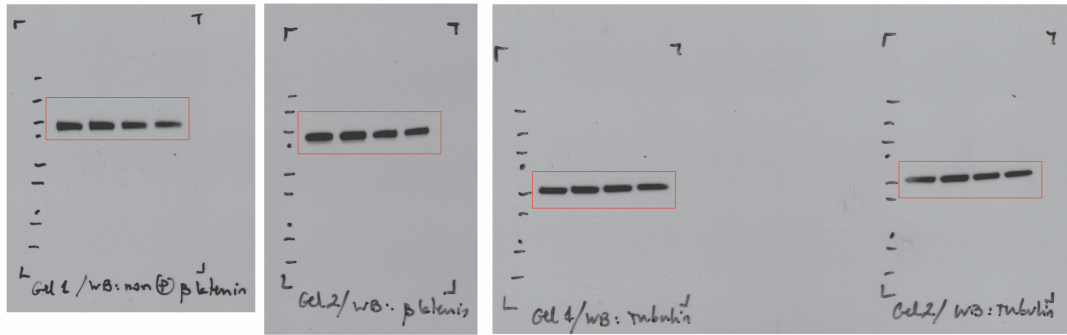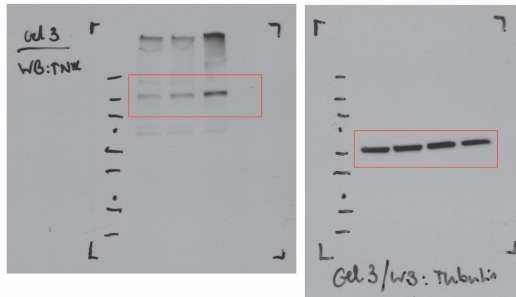

Supplementary Fig. S4C

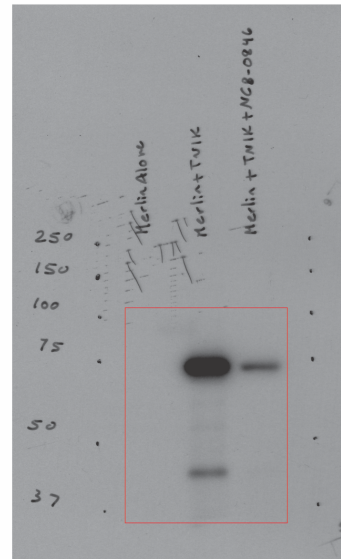

Supplementary Fig. S4E

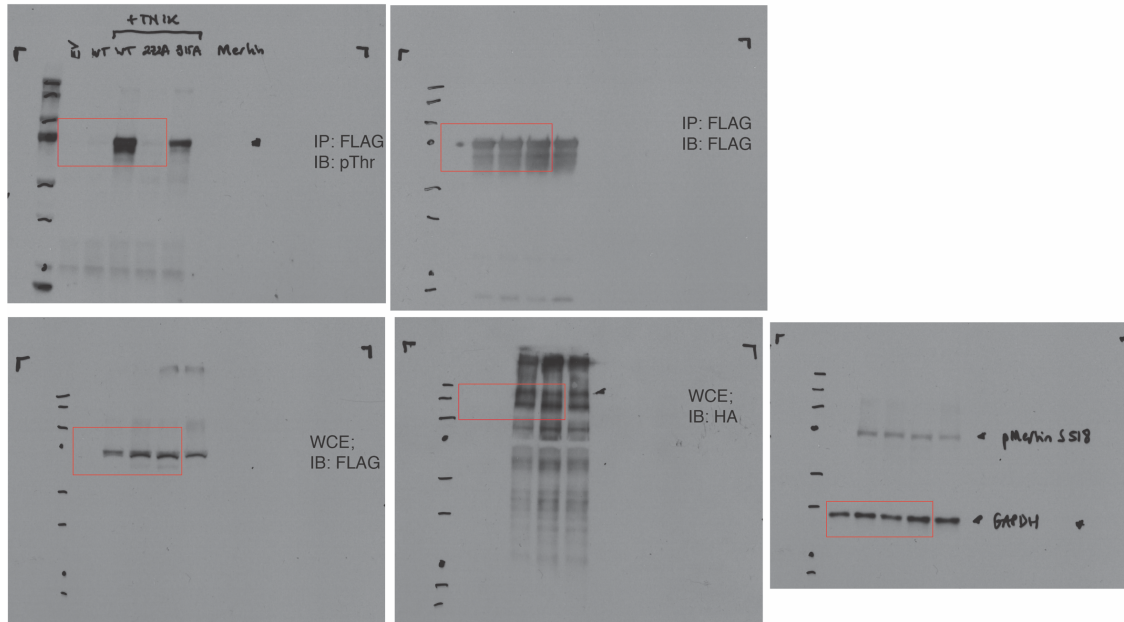

Supplementary Fig. S4F

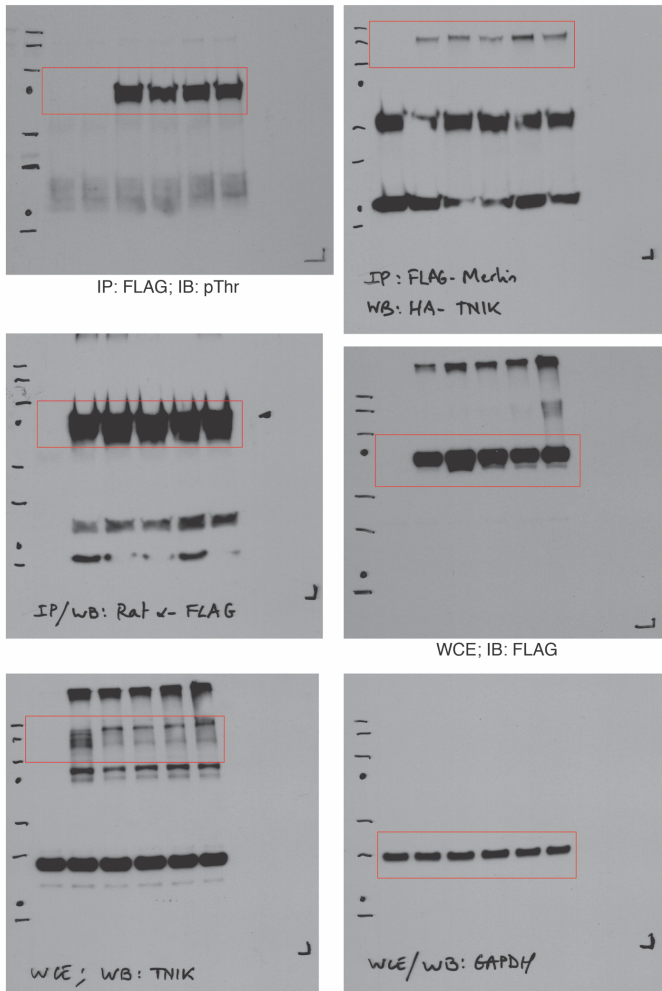

Supplementary Fig. S7A / LK2

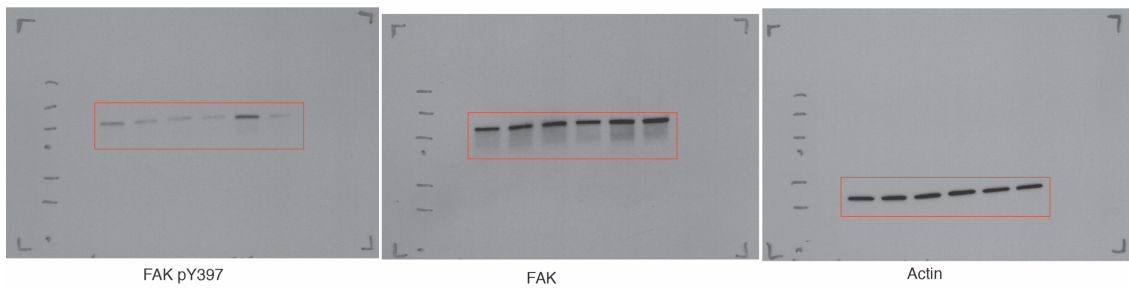

Supplementary Fig. S7A / NCI-H520

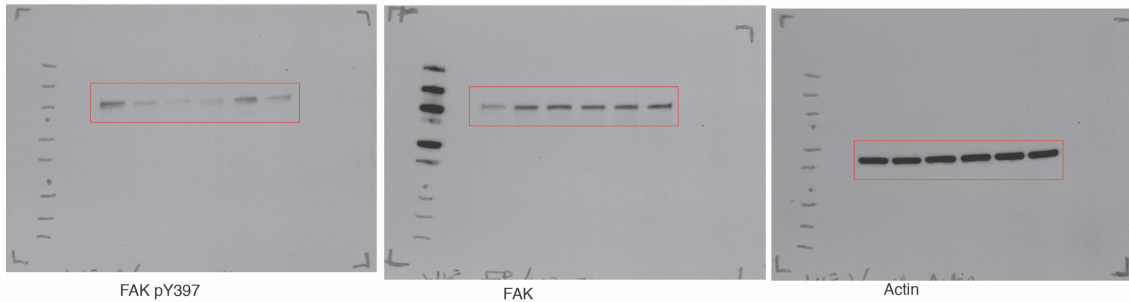

Supplementary Fig. S7B / LK2

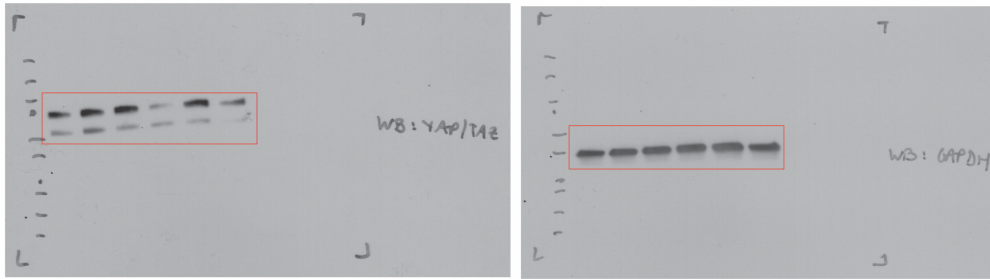

Supplementary Fig. S7B / NCI-H520

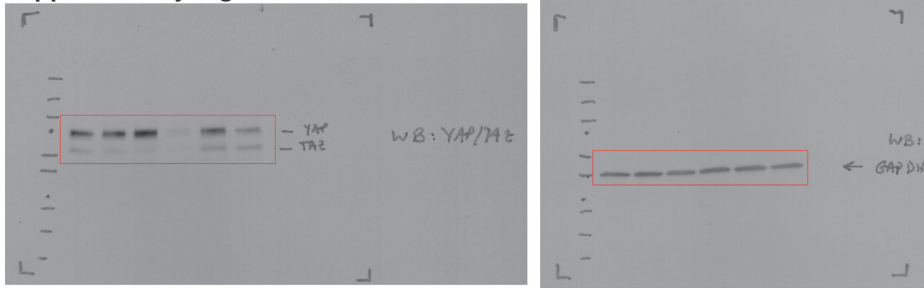

Supplementary Fig. S7C

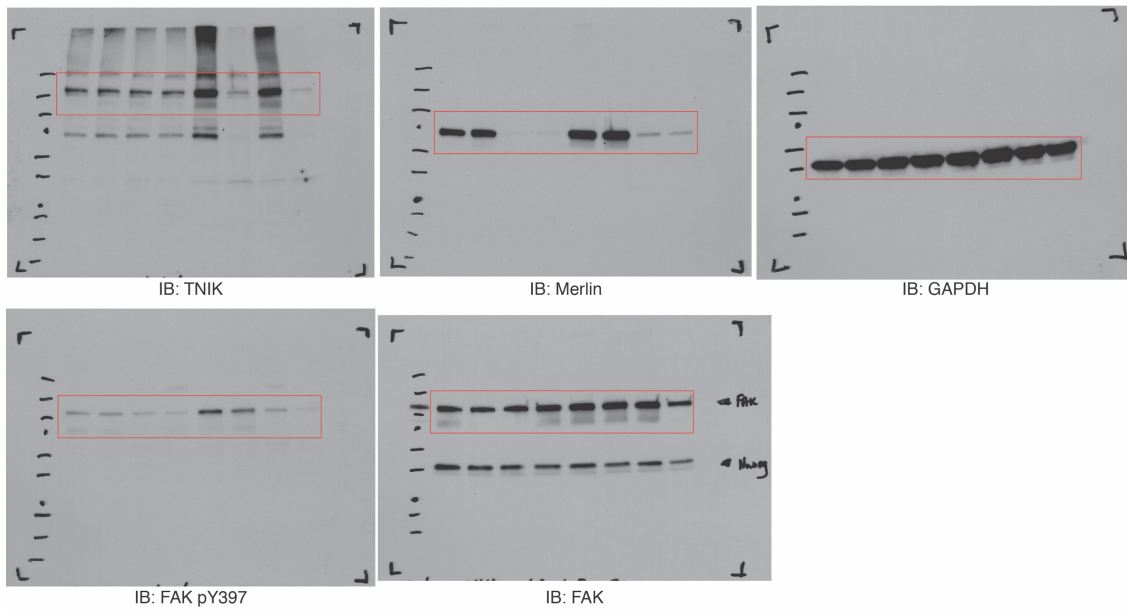

Supplementary Fig. S7D

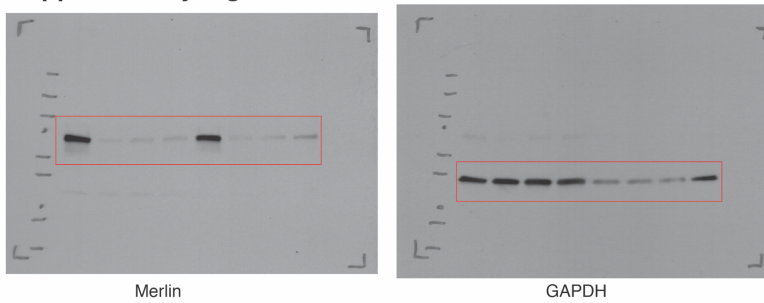

Supplementary Fig. S7E

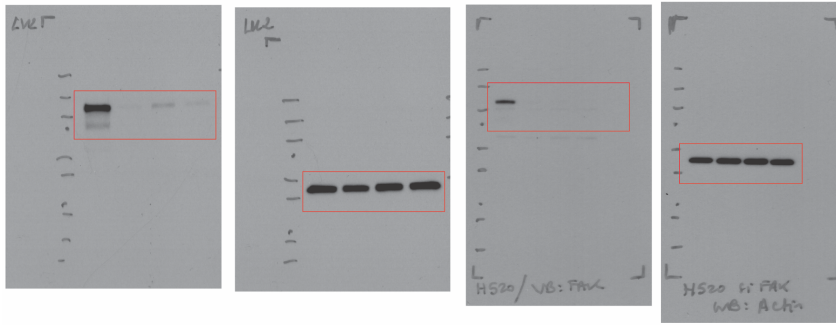

Supplementary Fig. S7F

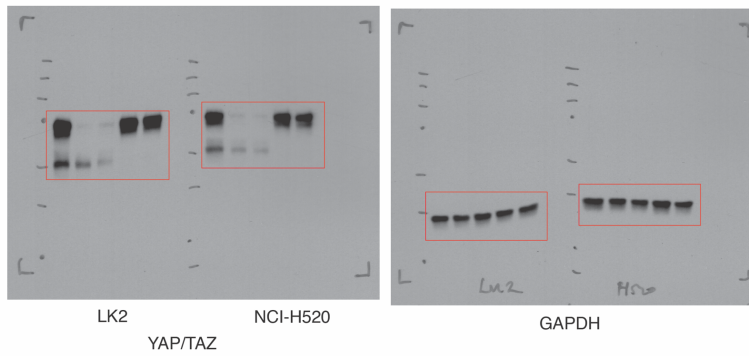

Supplementary Figure S8.2. Uncropped immunoblots reported in this study.
